# Supplementary material for: IL-7 coupled with IL-12 increases intratumoral T cell clonality, leading to complete regression of non-immunogenic tumors
Source: Springer Nature journal article supplement (doi:10.1007/s00262-021-02947-y), 2021-04-28
Supplement: MOESM1 [file 19113880]

| Mouse      | Top 5 CD8+ T-cell clones in tumors |         |                              |               | Spleen specimens     |       |               |
|------------|------------------------------------|---------|------------------------------|---------------|----------------------|-------|---------------|
|            | TRBV                               | TRBJ    | CDR3 $\beta$ region sequence | frequency (%) | Total in-frame reads | reads | Frequency (%) |
| PBS-1      | TRBV20                             | TRBJ1-1 | CGAROSNTEVFF                 | 3.93          | 149479               | 0     | 0.000         |
|            | TRBV16                             | TRBJ2-7 | CASSLDWGDYEQYF               | 3.02          |                      | 0     | 0.000         |
|            | TRBV29                             | TRBJ2-7 | CASROGEQYF                   | 2.91          |                      | 0     | 0.000         |
|            | TRBV5                              | TRBJ2-5 | CASSQVLGDTQYF                | 2.76          |                      | 0     | 0.000         |
|            | TRBV12-2                           | TRBJ2-1 | CASSPDWVYAEQFF               | 2.50          |                      | 0     | 0.000         |
| PBS-2      | TRBV16                             | TRBJ2-5 | CASSLELGGPTQYF               | 14.41         | 214985               | 0     | 0.000         |
|            | TRBV5                              | TRBJ2-1 | CASSQEQINTYAEQFF             | 3.15          |                      | 0     | 0.000         |
|            | TRBV19                             | TRBJ1-1 | CASSIKVANTEVFF               | 2.29          |                      | 0     | 0.000         |
|            | TRBV15                             | TRBJ2-7 | CASSLLGAYEQYF                | 2.26          |                      | 44    | 0.020         |
|            | TRBV12-2                           | TRBJ2-1 | CASSPTGGNYAEQFF              | 2.10          |                      | 0     | 0.000         |
| PBS-3      | TRBV12-1                           | TRBJ1-1 | CASSLRVAEYFF                 | 34.33         | 98053                | 0     | 0.000         |
|            | TRBV16                             | TRBJ2-3 | CASSLEGTAEITYF               | 25.68         |                      | 0     | 0.000         |
|            | TRBV19                             | TRBJ2-7 | CASSIRGVEQYF                 | 13.78         |                      | 0     | 0.000         |
|            | TRBV15                             | TRBJ2-7 | CASSLVGGASVEQYF              | 12.02         |                      | 0     | 0.000         |
|            | TRBV20                             | TRBJ2-1 | CGAGTGETEQFF                 | 4.57          |                      | 0     | 0.000         |
| PBS-4      | TRBV1                              | TRBJ1-4 | CTCSADGAGGNERLFF             | 6.34          | 174695               | 0     | 0.000         |
|            | TRBV3                              | TRBJ2-3 | CASSFSFSAETLYF               | 5.89          |                      | 0     | 0.000         |
|            | TRBV12-2                           | TRBJ2-5 | CASSQTGEHTQYF                | 4.22          |                      | 0     | 0.000         |
|            | TRBV12-2                           | TRBJ1-2 | CASSLSGSDYTF                 | 3.73          |                      | 0     | 0.000         |
|            | TRBV14                             | TRBJ2-4 | CASSFRGGQNTLYF               | 3.01          |                      | 0     | 0.000         |
| PBS-5      | TRBV16                             | TRBJ2-7 | CASSLELGGPEQYF               | 7.74          | 188571               | 0     | 0.000         |
|            | TRBV13-1                           | TRBJ2-3 | CASSDPGGSATLYF               | 3.77          |                      | 0     | 0.000         |
|            | TRBV12-2                           | TRBJ2-5 | CASSLGTKDTQYF                | 3.43          |                      | 0     | 0.000         |
|            | TRBV26                             | TRBJ1-1 | CASRDRTVEVFF                 | 3.03          |                      | 0     | 0.000         |
|            | TRBV13-2                           | TRBJ2-7 | CASGDALGVYEQYF               | 2.63          |                      | 0     | 0.000         |
| Cont-VV-1  | TRBV15                             | TRBJ2-5 | CASSLRDKDKDTQYF              | 5.78          | 123343               | 9     | 0.007         |
|            | TRBV14                             | TRBJ1-5 | CASSFTGTNNQAPLF              | 5.69          |                      | 95    | 0.077         |
|            | TRBV26                             | TRBJ2-4 | CASSLRSQNTLYF                | 5.61          |                      | 0     | 0.000         |
|            | TRBV17                             | TRBJ2-1 | CASSGRDRVSAEQFF              | 3.08          |                      | 0     | 0.000         |
|            | TRBV14                             | TRBJ1-5 | CASSNTGYNQAPLF               | 2.47          |                      | 42    | 0.034         |
| Cont-VV-2  | TRBV14                             | TRBJ1-5 | CASSFTGRNNQAPLF              | 18.66         | 134999               | 600   | 0.444         |
|            | TRBV14                             | TRBJ1-3 | CASSPRDRDQNTLYF              | 6.72          |                      | 26    | 0.019         |
|            | TRBV15                             | TRBJ1-1 | CASSLPQNTVEVFF               | 3.55          |                      | 0     | 0.000         |
|            | TRBV3                              | TRBJ2-7 | CASSLGTGSVEQYF               | 2.82          |                      | 0     | 0.000         |
|            | TRBV13-1                           | TRBJ1-1 | CASSDAGQGAIEVFF              | 2.28          |                      | 0     | 0.000         |
| Cont-VV-3  | TRBV14                             | TRBJ2-3 | CASSLHSAETLYF                | 5.87          | 136749               | 775   | 0.567         |
|            | TRBV14                             | TRBJ1-5 | CASSSTGYNQAPLF               | 5.86          |                      | 806   | 0.589         |
|            | TRBV3                              | TRBJ1-5 | CASSPGTGRNNQAPLF             | 3.40          |                      | 210   | 0.154         |
|            | TRBV12-1                           | TRBJ2-7 | CASSRTGDSVEQYF               | 2.26          |                      | 0     | 0.000         |
|            | TRBV12-2                           | TRBJ2-3 | CASSLVPAETLYF                | 1.90          |                      | 102   | 0.075         |
| Cont-VV-4  | TRBV13-3                           | TRBJ1-4 | CASRGQISNERLFF               | 6.82          | 94574                | 0     | 0.000         |
|            | TRBV12-1                           | TRBJ2-7 | CASSLGLGAYEQYF               | 3.78          |                      | 0     | 0.000         |
|            | TRBV19                             | TRBJ2-3 | CASSIRGGRGAETLYF             | 3.31          |                      | 0     | 0.000         |
|            | TRBV14                             | TRBJ1-5 | CASSSTGHNNQAPLF              | 3.18          |                      | 9     | 0.010         |
|            | TRBV1                              | TRBJ2-2 | CTCSVDRVDTGQLYF              | 3.02          |                      | 0     | 0.000         |
| Cont-VV-5  | TRBV14                             | TRBJ1-5 | CASSSTGENNQAPLF              | 7.24          | 166299               | 26    | 0.016         |
|            | TRBV31                             | TRBJ1-5 | CAWSQQGRNNQAPLF              | 6.89          |                      | 0     | 0.000         |
|            | TRBV13-2                           | TRBJ2-4 | CASSGWGGQNTLYF               | 6.08          |                      | 0     | 0.000         |
|            | TRBV12-2                           | TRBJ2-1 | CASSLLDWGSYAEQFF             | 6.04          |                      | 37    | 0.022         |
|            | TRBV17                             | TRBJ2-5 | CASSKTGGDTQYF                | 5.54          |                      | 0     | 0.000         |
| hIL-7-VV-1 | TRBV15                             | TRBJ1-4 | CASSLGTNNERLFF               | 7.92          | 154527               | 0     | 0.000         |
|            | TRBV15                             | TRBJ2-4 | CASSLGHQNTLYF                | 6.00          |                      | 0     | 0.000         |
|            | TRBV5                              | TRBJ2-5 | CASSPNWGGQDTQYF              | 4.57          |                      | 304   | 0.197         |
|            | TRBV2                              | TRBJ1-1 | CASSHQDTEVFF                 | 4.18          |                      | 0     | 0.000         |
|            | TRBV29                             | TRBJ2-1 | CASSLFDRAVYAEQFF             | 2.98          |                      | 48    | 0.031         |
| hIL-7-VV-2 | TRBV5                              | TRBJ2-7 | CASSQPGAYEQYF                | 4.78          | 244335               | 0     | 0.000         |
|            | TRBV13-2                           | TRBJ2-7 | CASGRDFVEQYF                 | 3.50          |                      | 0     | 0.000         |
|            | TRBV4                              | TRBJ2-7 | CASSPGTYEQYF                 | 2.89          |                      | 0     | 0.000         |
|            | TRBV4                              | TRBJ1-6 | CASSRQGENNSPLYF              | 2.75          |                      | 0     | 0.000         |
|            | TRBV14                             | TRBJ1-5 | CASSSTGYNQAPLF               | 2.47          |                      | 37    | 0.015         |
| hIL-7-VV-3 | TRBV26                             | TRBJ2-1 | CASSLRDWGAYAEQFF             | 4.85          | 182909               | 0     | 0.000         |
|            | TRBV16                             | TRBJ2-1 | CASSPLGEGEQFF                | 4.63          |                      | 0     | 0.000         |
|            | TRBV1                              | TRBJ2-5 | CTCSADRQEDTQYF               | 2.84          |                      | 0     | 0.000         |
|            | TRBV29                             | TRBJ2-5 | CASSPRQIQDTQYF               | 2.55          |                      | 21    | 0.011         |
|            | TRBV17                             | TRBJ2-7 | CASSAGTAYEQYF                | 2.49          |                      | 0     | 0.000         |
| hIL-7-VV-4 | TRBV4                              | TRBJ1-5 | CASSRQGENNQAPLF              | 4.24          | 211739               | 66    | 0.031         |
|            | TRBV4                              | TRBJ2-7 | CASSLSYEQYF                  | 3.58          |                      | 0     | 0.000         |
|            | TRBV13-2                           | TRBJ2-7 | CASSGPGYEQYF                 | 3.58          |                      | 0     | 0.000         |
|            | TRBV1                              | TRBJ2-4 | CTCSAYRASQNTLYF              | 3.47          |                      | 0     | 0.000         |
|            | TRBV12-2                           | TRBJ2-4 | CASSLAWGRRNTLYF              | 2.82          |                      | 0     | 0.000         |

| Mouse             | Top 5 CD8+ T-cell clones in tumors |         |                              |               | Spleen specimens     |       |               |
|-------------------|------------------------------------|---------|------------------------------|---------------|----------------------|-------|---------------|
|                   | TRBV                               | TRBJ    | CDR3 $\beta$ region sequence | frequency (%) | Total in-frame reads | reads | Frequency (%) |
| mIL-12-VV-1       | TRBV3                              | TRBJ2-3 | CASSPDWGGAEITYF              | 9.65          | 179484               | 100   | 0.056         |
|                   | TRBV12-2                           | TRBJ2-1 | CASSSGWGRNYAEQFF             | 9.25          |                      | 470   | 0.262         |
|                   | TRBV13-3                           | TRBJ2-7 | CASSYRGLQYF                  | 4.42          |                      | 462   | 0.257         |
|                   | TRBV13-2                           | TRBJ2-4 | CASGEGYGGAQNRNTLYF           | 3.69          |                      | 3970  | 2.212         |
|                   | TRBV26                             | TRBJ1-2 | CASSLRQNSDYTF                | 3.57          |                      | 270   | 0.150         |
| mIL-12-VV-2       | TRBV19                             | TRBJ2-5 | CASSIGDQDTQYF                | 55.79         | 132120               | 0     | 0.000         |
|                   | TRBV13-1                           | TRBJ2-1 | CASSQGNVYAEQFF               | 28.25         |                      | 1118  | 0.846         |
|                   | TRBV20                             | TRBJ1-2 | CGARVRGNSDYTF                | 10.98         |                      | 580   | 0.439         |
|                   | TRBV13-1                           | TRBJ2-1 | CASSQGNVYAEQFF               | 0.15          |                      | 1     | 0.001         |
|                   | TRBV19                             | TRBJ2-5 | CANSIGDQDTQYF                | 0.14          |                      | 0     | 0.000         |
| mIL-12-VV-3       | TRBV13-3                           | TRBJ1-1 | CASRTANTEVFF                 | 36.27         | 126558               | 4158  | 3.285         |
|                   | TRBV3                              | TRBJ1-1 | CASSLTANTEVFF                | 5.04          |                      | 73    | 0.058         |
|                   | TRBV13-3                           | TRBJ1-2 | CASSYRDSYTF                  | 2.85          |                      | 222   | 0.175         |
|                   | TRBV19                             | TRBJ2-4 | CASWGGNTLYF                  | 2.29          |                      | 217   | 0.171         |
|                   | TRBV26                             | TRBJ2-3 | CASSPQGAETLYF                | 2.27          |                      | 0     | 0.000         |
| mIL-12-VV-4       | TRBV3                              | TRBJ2-3 | CASSPDWGGAEITYF              | 6.75          | 185935               | 243   | 0.131         |
|                   | TRBV4                              | TRBJ2-7 | CASSYGGASVEQYF               | 5.39          |                      | 154   | 0.083         |
|                   | TRBV20                             | TRBJ1-1 | CGARQNTVEVFF                 | 4.76          |                      | 1867  | 1.004         |
|                   | TRBV3                              | TRBJ1-4 | CASSLQNTANERLFF              | 1.75          |                      | 140   | 0.075         |
|                   | TRBV14                             | TRBJ2-7 | CASSFLGLEQYF                 | 1.52          |                      | 907   | 0.488         |
| hIL-7/mIL-12-VV-1 | TRBV13-1                           | TRBJ2-4 | CASSLTTGQNTLYF               | 12.13         | 160466               | 126   | 0.079         |
|                   | TRBV5                              | TRBJ2-4 | CASSQGGQNTLYF                | 11.05         |                      | 1266  | 0.789         |
|                   | TRBV13-1                           | TRBJ2-1 | CASSTGGVYAEQFF               | 8.14          |                      | 132   | 0.082         |
|                   | TRBV16                             | TRBJ2-7 | CASSLELGGREQYF               | 6.27          |                      | 49    | 0.031         |
|                   | TRBV13-2                           | TRBJ2-7 | CASGDARLVSSVEQYF             | 4.33          |                      | 0     | 0.000         |
| hIL-7/mIL-12-VV-2 | TRBV13-1                           | TRBJ2-7 | CASSVRDREDEQYF               | 39.77         | 131217               | 0     | 0.000         |
|                   | TRBV29                             | TRBJ1-4 | CASSFSPNERLFF                | 25.90         |                      | 57    | 0.043         |
|                   | TRBV13-3                           | TRBJ1-4 | CASSGTISNERLFF               | 24.95         |                      | 57    | 0.043         |
|                   | TRBV4                              | TRBJ2-7 | CASSTPGTGGVEQYF              | 1.27          |                      | 0     | 0.000         |
|                   | TRBV29                             | TRBJ1-4 | CASSFSPANERLFF               | 0.23          |                      | 0     | 0.000         |
| hIL-7/mIL-12-VV-3 | TRBV14                             | TRBJ2-7 | CASSLGTGGEEQYF               | 42.39         | 352049               | 2484  | 0.706         |
|                   | TRBV1                              | TRBJ2-4 | CTCSEGWGEQNTLYF              | 26.86         |                      | 0     | 0.000         |
|                   | TRBV14                             | TRBJ2-4 | CASSLGVQNTLYF                | 24.04         |                      | 0     | 0.000         |
|                   | TRBV14                             | TRBJ2-7 | RASSLGTGGEEQYF               | 0.15          |                      | 1     | 0.000         |
|                   | TRBV14                             | TRBJ2-7 | CASSVGTGGEEQYF               | 0.15          |                      | 1     | 0.000         |
| hIL-7/mIL-12-VV-4 | TRBV5                              | TRBJ1-4 | CASSRQGAERLFF                | 26.21         | 154362               | 0     | 0.000         |
|                   | TRBV14                             | TRBJ2-2 | CASSSLGEGDTGQLYF             | 21.34         |                      | 0     | 0.000         |
|                   | TRBV16                             | TRBJ2-3 | CASSRDRGGETLYF               | 8.66          |                      | 0     | 0.000         |
|                   | TRBV17                             | TRBJ2-7 | CASSRDLVSSVEQYF              | 5.21          |                      | 0     | 0.000         |
|                   | TRBV20                             | TRBJ2-5 | CGAKLVQDTQYF                 | 4.42          |                      | 216   | 0.140         |
| hIL-7/mIL-12-VV-5 | TRBV14                             | TRBJ2-4 | CASSPTSSQNTLYF               | 10.14         | 205548               | 65    | 0.032         |
|                   | TRBV5                              | TRBJ2-7 | CASSQTRDWGVEQYF              | 5.51          |                      | 1177  | 0.573         |
|                   | TRBV13-3                           | TRBJ2-5 | CASSPNWGGQNTLYF              | 3.87          |                      | 125   | 0.061         |
|                   | TRBV5                              | TRBJ2-7 | CASSPPGDEQYF                 | 3.65          |                      | 395   | 0.192         |
|                   | TRBV29                             | TRBJ2-1 | CASSLLNYAEQFF                | 2.51          |                      | 440   | 0.214         |
