# Supplementary material for: IL-7 coupled with IL-12 increases intratumoral T cell clonality, leading to complete regression of non-immunogenic tumors
Source: Springer Nature journal article supplement (doi:10.1007/s00262-021-02947-y), 2021-04-28
Supplement: MOESM2 [file 19113880]

| Mouse      | Top 5 CD4+ T-cell clones in tumors |         |                             |               | Spleen specimens     |       |               |
|------------|------------------------------------|---------|-----------------------------|---------------|----------------------|-------|---------------|
|            | TRBV                               | TRBJ    | CDR3 $\beta$ reion sequence | frequency (%) | Total in-frame reads | reads | Frequency (%) |
| PBS-1      | TRBV19                             | TRBJ2-1 | CASSPLGYAEQFF               | 3.16          | 194738               | 0     | 0.000         |
|            | TRBV26                             | TRBJ1-4 | CASSLSRGPNERLFF             | 3.13          |                      | 0     | 0.000         |
|            | TRBV26                             | TRBJ1-3 | CASSLAGSGNTLYF              | 2.83          |                      | 0     | 0.000         |
|            | TRBV5                              | TRBJ1-1 | CASSQPGQTEVFF               | 2.56          |                      | 0     | 0.000         |
|            | TRBV29                             | TRBJ2-7 | CASSLPGGYEQYF               | 2.42          |                      | 0     | 0.000         |
| PBS-2      | TRBV12-2                           | TRBJ2-7 | CASSHRGEQYF                 | 4.08          | 116960               | 0     | 0.000         |
|            | TRBV26                             | TRBJ1-6 | CASSLSRGGSPLYF              | 2.63          |                      | 2     | 0.002         |
|            | TRBV26                             | TRBJ2-1 | CASSRRTDNYAEQFF             | 2.61          |                      | 1     | 0.001         |
|            | TRBV1                              | TRBJ2-7 | CTCSAPDNYEQYF               | 2.61          |                      | 13    | 0.011         |
|            | TRBV16                             | TRBJ2-5 | CASSFFNQDQYF                | 2.25          |                      | 1     | 0.001         |
| PBS-3      | TRBV13-1                           | TRBJ2-7 | CASSDEGRAYEQYF              | 9.67          | 203738               | 0     | 0.000         |
|            | TRBV5                              | TRBJ1-3 | CASSQENSNTLYF               | 8.44          |                      | 0     | 0.000         |
|            | TRBV16                             | TRBJ2-4 | CASSLDDQNTLYF               | 7.65          |                      | 0     | 0.000         |
|            | TRBV26                             | TRBJ2-4 | CASRDGRRGGQNTLYF            | 7.34          |                      | 0     | 0.000         |
|            | TRBV26                             | TRBJ2-1 | CASSPDRDAEQFF               | 5.69          |                      | 69    | 0.034         |
| PBS-4      | TRBV12-2                           | TRBJ2-4 | CASSPPGGWNTLYF              | 7.82          | 173960               | 0     | 0.000         |
|            | TRBV1                              | TRBJ1-2 | CTCSATGTGNSDYTF             | 6.60          |                      | 0     | 0.000         |
|            | TRBV3                              | TRBJ1-3 | CASSPQGGNTLYF               | 3.58          |                      | 0     | 0.000         |
|            | TRBV13-2                           | TRBJ2-7 | CASGVGGDEQYF                | 2.19          |                      | 0     | 0.000         |
|            | TRBV13-3                           | TRBJ1-4 | CASSLGLQSNRERLFF            | 1.96          |                      | 0     | 0.000         |
| PBS-5      | TRBV13-2                           | TRBJ2-1 | CASGEGLGGLAEQFF             | 8.22          | 197775               | 422   | 0.213         |
|            | TRBV5                              | TRBJ2-4 | CASSLDISQNTLYF              | 2.34          |                      | 0     | 0.000         |
|            | TRBV16                             | TRBJ2-7 | CASSLELGGPEQYF              | 2.20          |                      | 0     | 0.000         |
|            | TRBV23                             | TRBJ2-7 | CSSSPSGGAYEQYF              | 2.13          |                      | 1152  | 0.582         |
|            | TRBV5                              | TRBJ2-7 | CASSQDPGGFYEQYF             | 1.55          |                      | 0     | 0.000         |
| Cont-VV-1  | TRBV1                              | TRBJ1-3 | CTCSAGGSGNTLYF              | 9.43          | 162775               | 0     | 0.000         |
|            | TRBV15                             | TRBJ1-1 | CASSPTGNTEVFF               | 1.25          |                      | 0     | 0.000         |
|            | TRBV15                             | TRBJ1-6 | CASSQLNF                    | 1.23          |                      | 0     | 0.000         |
|            | TRBV15                             | TRBJ2-2 | CASSLWGGAGTQQLYF            | 1.09          |                      | 35    | 0.022         |
|            | TRBV2                              | TRBJ1-6 | CASSQDPYNSPLYF              | 1.04          |                      | 0     | 0.000         |
| Cont-VV-2  | TRBV5                              | TRBJ2-7 | CASSQEGLGREQYF              | 1.93          | 214434               | 0     | 0.000         |
|            | TRBV19                             | TRBJ1-3 | CASSISRSNTLYF               | 1.77          |                      | 339   | 0.158         |
|            | TRBV14                             | TRBJ1-2 | CASSFQGSNDYTF               | 1.65          |                      | 23    | 0.011         |
|            | TRBV1                              | TRBJ2-4 | CTCSAGRGSQNTLYF             | 1.55          |                      | 71    | 0.033         |
|            | TRBV12-1                           | TRBJ2-1 | CASSLRDWGVAEQFF             | 1.50          |                      | 0     | 0.000         |
| Cont-VV-3  | TRBV29                             | TRBJ2-5 | CASSLRDGRDQYF               | 1.63          | 83819                | 127   | 0.152         |
|            | TRBV15                             | TRBJ1-1 | CASSLQGGTEVFF               | 1.59          |                      | 0     | 0.000         |
|            | TRBV16                             | TRBJ2-4 | CASSLEGDLYF                 | 1.50          |                      | 87    | 0.104         |
|            | TRBV5                              | TRBJ1-1 | CASSQVNTVEFF                | 1.33          |                      | 0     | 0.000         |
|            | TRBV17                             | TRBJ1-1 | CASSRRDRATEVFF              | 1.33          |                      | 27    | 0.032         |
| Cont-VV-4  | TRBV12-2                           | TRBJ2-7 | CASSLTOEQYF                 | 1.74          | 215054               | 69    | 0.032         |
|            | TRBV13-2                           | TRBJ2-5 | CASGLDWGGDDQYF              | 1.06          |                      | 0     | 0.000         |
|            | TRBV26                             | TRBJ2-4 | CASSLDWGSQNTLYF             | 0.95          |                      | 0     | 0.000         |
|            | TRBV5                              | TRBJ1-1 | CASSPQNTVEFF                | 0.90          |                      | 0     | 0.000         |
|            | TRBV29                             | TRBJ2-7 | CASSPGTGGYEQYF              | 0.90          |                      | 0     | 0.000         |
| Cont-VV-5  | TRBV12-2                           | TRBJ2-4 | CASSLESQNTLYF               | 2.72          | 72737                | 0     | 0.000         |
|            | TRBV12-2                           | TRBJ1-3 | CASSLSGNTLYF                | 2.26          |                      | 0     | 0.000         |
|            | TRBV23                             | TRBJ1-1 | CSSSQLWANTVEFF              | 1.43          |                      | 3     | 0.004         |
|            | TRBV19                             | TRBJ2-7 | CASSIGTGAYEQYF              | 1.27          |                      | 0     | 0.000         |
|            | TRBV3                              | TRBJ2-5 | CASSLDWGQDQYF               | 1.18          |                      | 0     | 0.000         |
| hIL-7-VV-1 | TRBV16                             | TRBJ1-1 | CASSLGGQNTVEFF              | 1.81          | 254597               | 13    | 0.005         |
|            | TRBV13-2                           | TRBJ1-1 | CASGDGAGQNTVEFF             | 1.60          |                      | 0     | 0.000         |
|            | TRBV12-2                           | TRBJ1-5 | CASSRQDQAPLF                | 1.43          |                      | 0     | 0.000         |
|            | TRBV19                             | TRBJ2-5 | CASSRMDTQYF                 | 1.24          |                      | 35    | 0.014         |
|            | TRBV12-2                           | TRBJ2-5 | CASSPTGDQDQYF               | 1.00          |                      | 0     | 0.000         |
| hIL-7-VV-2 | TRBV5                              | TRBJ2-2 | CASSPGTVNTGQLYF             | 1.37          | 247258               | 0     | 0.000         |
|            | TRBV26                             | TRBJ2-4 | CASSRDWGSQNTLYF             | 1.19          |                      | 23    | 0.009         |
|            | TRBV1                              | TRBJ2-3 | CTCSAVGGGAETLYF             | 1.07          |                      | 466   | 0.188         |
|            | TRBV26                             | TRBJ1-1 | CASSPGPNTVEFF               | 1.03          |                      | 0     | 0.000         |
|            | TRBV12-2                           | TRBJ1-4 | CASSRSNERLFF                | 0.80          |                      | 0     | 0.000         |
| hIL-7-VV-3 | TRBV26                             | TRBJ1-2 | CASSLGTGGSDYTF              | 1.79          | 202748               | 5     | 0.002         |
|            | TRBV13-2                           | TRBJ1-1 | CASSGGANTVEFF               | 1.68          |                      | 0     | 0.000         |
|            | TRBV16                             | TRBJ1-1 | CASSLGGQNTVEFF              | 1.30          |                      | 0     | 0.000         |
|            | TRBV13-3                           | TRBJ1-4 | CASSHRAERLFF                | 1.30          |                      | 0     | 0.000         |
|            | TRBV5                              | TRBJ2-2 | CASSQEGINTGQLYF             | 1.19          |                      | 0     | 0.000         |
| hIL-7-VV-4 | TRBV13-2                           | TRBJ1-1 | CASGDAYITEVFF               | 2.19          | 256586               | 9     | 0.004         |
|            | TRBV3                              | TRBJ2-7 | CASSLALWGYEQYF              | 1.11          |                      | 0     | 0.000         |
|            | TRBV5                              | TRBJ1-1 | CASSQGWVEVFF                | 1.11          |                      | 0     | 0.000         |
|            | TRBV5                              | TRBJ1-4 | CASSQEGTGNRERLFF            | 1.07          |                      | 164   | 0.064         |
|            | TRBV23                             | TRBJ2-3 | CSSSRQGSSETLYF              | 1.04          |                      | 0     | 0.000         |

| Mouse             | Top 5 CD4+ T-cell clones in tumors |         |                             |               | Spleen specimens     |       |               |
|-------------------|------------------------------------|---------|-----------------------------|---------------|----------------------|-------|---------------|
|                   | TRBV                               | TRBJ    | CDR3 $\beta$ reion sequence | frequency (%) | Total in-frame reads | reads | Frequency (%) |
| mIL-12-VV-1       | TRBV1                              | TRBJ2-7 | CTCSAGOGWEQYF               | 8.51          | 186216               | 0     | 0.000         |
|                   | TRBV16                             | TRBJ2-5 | CASSLEGGQDQYF               | 7.60          |                      | 329   | 0.177         |
|                   | TRBV1                              | TRBJ2-5 | CTCSALGTSQDQYF              | 6.25          |                      | 0     | 0.000         |
|                   | TRBV13-1                           | TRBJ1-1 | CASSDGGTEVFF                | 5.31          |                      | 0     | 0.000         |
|                   | TRBV17                             | TRBJ2-7 | CASSPWASSYEQYF              | 4.98          |                      | 0     | 0.000         |
|                   | TRBV13-2                           | TRBJ1-2 | CASGDADRRGSDYTF             | 89.65         |                      | 0     | 0.000         |
| mIL-12-VV-2       | TRBV13-2                           | TRBJ1-2 | WASGDADRRGSDYTF             | 0.48          | 125750               | 0     | 0.000         |
|                   | TRBV13-2                           | TRBJ1-2 | CASGDADRRGSDYTF             | 0.31          |                      | 0     | 0.000         |
|                   | TRBV13-2                           | TRBJ1-2 | CAGGDADRRGSDYTF             | 0.25          |                      | 0     | 0.000         |
|                   | TRBV13-2                           | TRBJ1-2 | CASGDVDRRGSDYTF             | 0.20          |                      | 0     | 0.000         |
|                   | TRBV13-3                           | TRBJ1-1 | CASSGQGNTEVFF               | 6.45          |                      | 547   | 0.296         |
|                   | TRBV3                              | TRBJ2-5 | CASSRDWGDQYF                | 6.30          |                      | 890   | 0.482         |
| mIL-12-VV-3       | TRBV15                             | TRBJ2-7 | CASSPMITGGEQYF              | 6.30          | 184538               | 0     | 0.000         |
|                   | TRBV3                              | TRBJ2-5 | CASSLETNDQDQYF              | 5.80          |                      | 0     | 0.000         |
|                   | TRBV17                             | TRBJ2-4 | CASSRLGVQNTLYF              | 5.29          |                      | 180   | 0.098         |
|                   | TRBV16                             | TRBJ2-4 | CASSLEQNTLYF                | 16.07         |                      | 113   | 0.074         |
|                   | TRBV13-2                           | TRBJ2-7 | CASGDWGGYEQYF               | 7.79          |                      | 1     | 0.001         |
|                   | TRBV20                             | TRBJ2-7 | CGARTEGDEQYF                | 5.39          |                      | 56    | 0.037         |
| mIL-12-VV-4       | TRBV15                             | TRBJ1-4 | CASRTAERLFF                 | 5.14          | 153242               | 0     | 0.000         |
|                   | TRBV16                             | TRBJ1-4 | CASSLEGGSNRERLFF            | 4.78          |                      | 43    | 0.028         |
| hIL-7/mIL-12-VV-1 | TRBV4                              | TRBJ2-5 | CASRVRRDQYF                 | 6.53          | 232697               | 7     | 0.003         |
|                   | TRBV14                             | TRBJ2-1 | CASSQTYNYAEQFF              | 5.44          |                      | 59    | 0.025         |
|                   | TRBV16                             | TRBJ2-5 | CASSLEGGEDTQYF              | 3.22          |                      | 10    | 0.004         |
|                   | TRBV13-2                           | TRBJ2-7 | CASGDAGGALGEOYF             | 3.20          |                      | 0     | 0.000         |
|                   | TRBV1                              | TRBJ1-1 | CTCSADPGTGEVFF              | 2.17          |                      | 0     | 0.000         |
| hIL-7/mIL-12-VV-2 | TRBV31                             | TRBJ1-1 | CAWSLMRDTEVFF               | 43.62         | 169089               | 0     | 0.000         |
|                   | TRBV12-2                           | TRBJ2-7 | CASSLWGGAEQYF               | 43.07         |                      | 0     | 0.000         |
|                   | TRBV16                             | TRBJ2-2 | CASSLDTNTGQLYF              | 5.45          |                      | 0     | 0.000         |
|                   | TRBV12-2                           | TRBJ2-7 | CASSRWGGAEQYF               | 0.21          |                      | 0     | 0.000         |
|                   | TRBV12-2                           | TRBJ2-7 | CASSLWGGAEQYF               | 0.19          |                      | 0     | 0.000         |
| hIL-7/mIL-12-VV-3 | TRBV15                             | TRBJ1-1 | CASSFYVFF                   | 49.60         | 179748               | 1     | 0.001         |
|                   | TRBV13-1                           | TRBJ2-3 | CASSDPGGTETLYF              | 31.61         |                      | 53    | 0.029         |
|                   | TRBV1                              | TRBJ2-4 | CTCSATGEGNTLYF              | 13.00         |                      | 0     | 0.000         |
|                   | TRBV15                             | TRBJ1-1 | CASSCVVFF                   | 0.17          |                      | 0     | 0.000         |
|                   | TRBV15                             | TRBJ1-1 | CASSVYVFF                   | 0.14          |                      | 0     | 0.000         |
| hIL-7/mIL-12-VV-4 | TRBV14                             | TRBJ2-4 | CASSYSQNTLYF                | 13.90         | 192924               | 53    | 0.027         |
|                   | TRBV13-2                           | TRBJ1-5 | CASGGGGDNNQAPLF             | 10.96         |                      | 0     | 0.000         |
|                   | TRBV19                             | TRBJ1-6 | CASSLQGFYNSPLYF             | 3.25          |                      | 19    | 0.010         |
|                   | TRBV31                             | TRBJ2-5 | CASSLGLGDQDQYF              | 3.19          |                      | 0     | 0.000         |
|                   | TRBV1                              | TRBJ2-7 | CTCSADGTGDYEQYF             | 3.19          |                      | 27    | 0.014         |
| hIL-7/mIL-12-VV-5 | TRBV14                             | TRBJ2-4 | CASSLPGQGGSQNTLYF           | 2.92          | 226968               | 286   | 0.126         |
|                   | TRBV2                              | TRBJ1-4 | CASSPQGTNERLFF              | 1.77          |                      | 0     | 0.000         |
|                   | TRBV23                             | TRBJ2-7 | CSSSQGTGGYEQYF              | 1.30          |                      | 69    | 0.030         |
|                   | TRBV13-2                           | TRBJ2-2 | CASGDWAGANTGQLYF            | 1.30          |                      | 1     | 0.000         |
|                   | TRBV31                             | TRBJ1-2 | CAWSLGIANSDYTF              | 1.29          |                      | 13    | 0.006         |
