# Supplementary material for: IL-7 coupled with IL-12 increases intratumoral T cell clonality, leading to complete regression of non-immunogenic tumors
Source: Springer Nature journal article supplement (doi:10.1007/s00262-021-02947-y), 2021-04-28
Supplement: MOESM3 [file 19113880]

### Supplementary Figure 1.

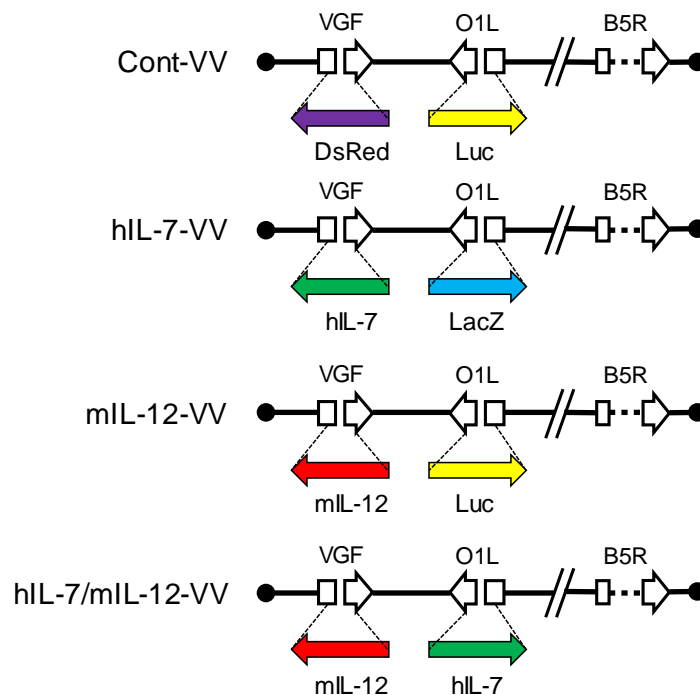

Schematic diagram of recombinant vaccinia viruses. Recombinant vaccinia viruses carrying transgenes expressing DsRed and luciferase (Cont-VV); human IL-7 and LacZ (hIL-7-VV); murine IL-12 and luciferase (mIL-12-VV); and human IL-7 and murine IL-12 (hIL-7/mIL-12-VV) were used in this study. Based on LC16mO, an attenuated vaccine strain, the viruses were modified with a functional deletion of vaccinia virus growth factor (VGF) and O1L by inserting the indicated transgenes with the aim of inducing tumor-selective viral replication. In addition, the B5R membrane protein was partially deleted with the aim of reducing antigenicity.

## Supplementary Figure 2.

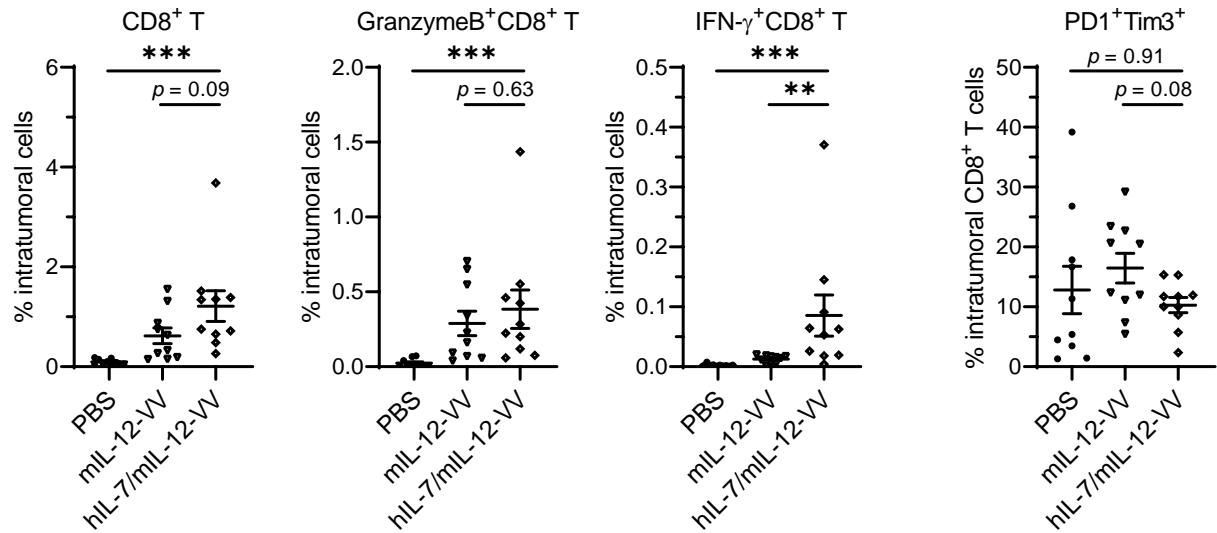

Increase in activated CD8<sup>+</sup> T cells in LLC tumors at different time points after treatment with mIL-12-VV or hIL-7/mIL-12-VV. Mice bearing subcutaneous LLC tumors were intratumorally injected with PBS,  $2 \times 10^7$  pfu of mIL-12-VV or hIL-7/mIL-12-VV for a total of three times (on Days 1, 3 and 4). Twelve days after the last treatment (on Day 16), tumor-infiltrating CD8<sup>+</sup> T cells were analyzed by flow cytometry (n = 10). \*\* $p < 0.01$  and \*\*\* $p < 0.001$  by Mann-Whitney *U* test.

Mean  $\pm$  SEM.

### Supplementary Figure 3.

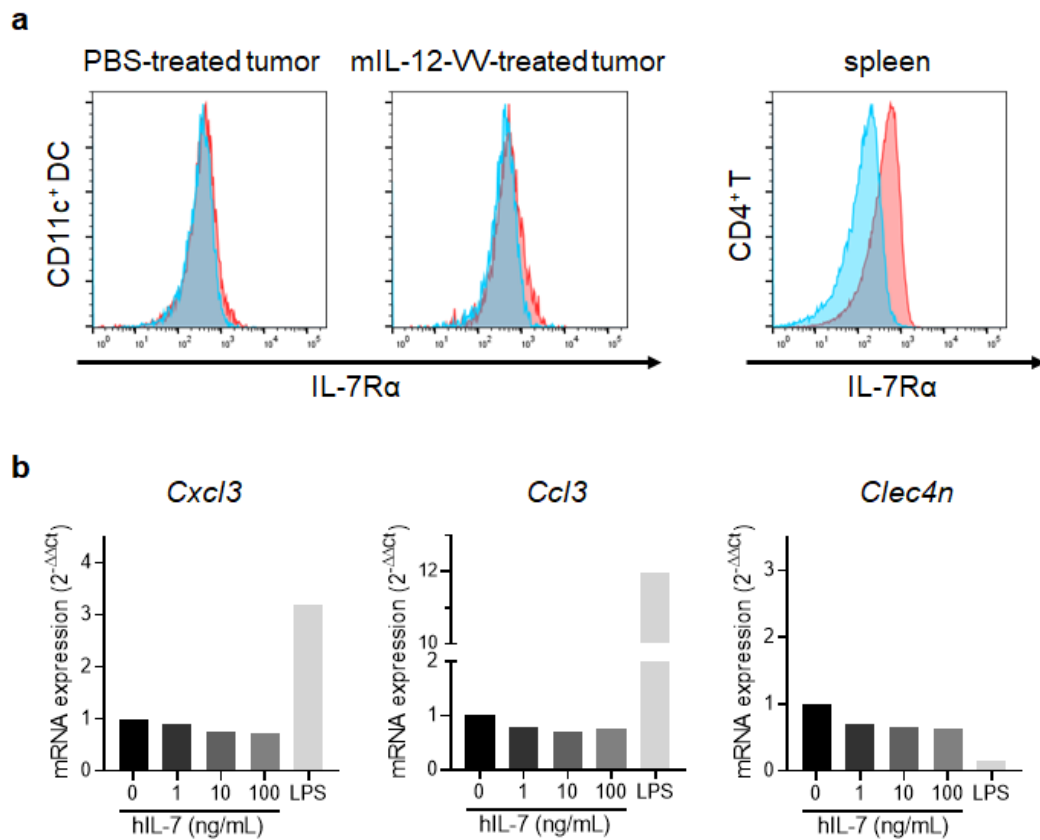

Effect of IL-7 on LLC-derived DCs. **a** Expression of IL-7R $\alpha$  in intratumoral CD11c<sup>+</sup> DCs and splenic CD4<sup>+</sup> T cells. Mice bearing subcutaneous LLC tumors were intratumorally injected with PBS or  $2 \times 10^7$  pfu of mIL-12-VV. Two days after treatment, intratumoral CD11c<sup>+</sup> DCs were analyzed by flow cytometry. Likewise, splenic CD4<sup>+</sup> T cells were analyzed as a positive control for IL-7R $\alpha$  staining. Red: expression intensity of IL-7R $\alpha$ , blue: control. Representative histograms are shown. **b** Effect of IL-7 on gene expression of *Cxcl3*, *Ccl3* and *Clec4n* in CD11c<sup>+</sup> DCs isolated from LLC tumors which had been treated with mIL-12-VV as described above. Gene expression levels normalized to  $\beta$ -actin are shown.

**Supplementary Figure 4.**

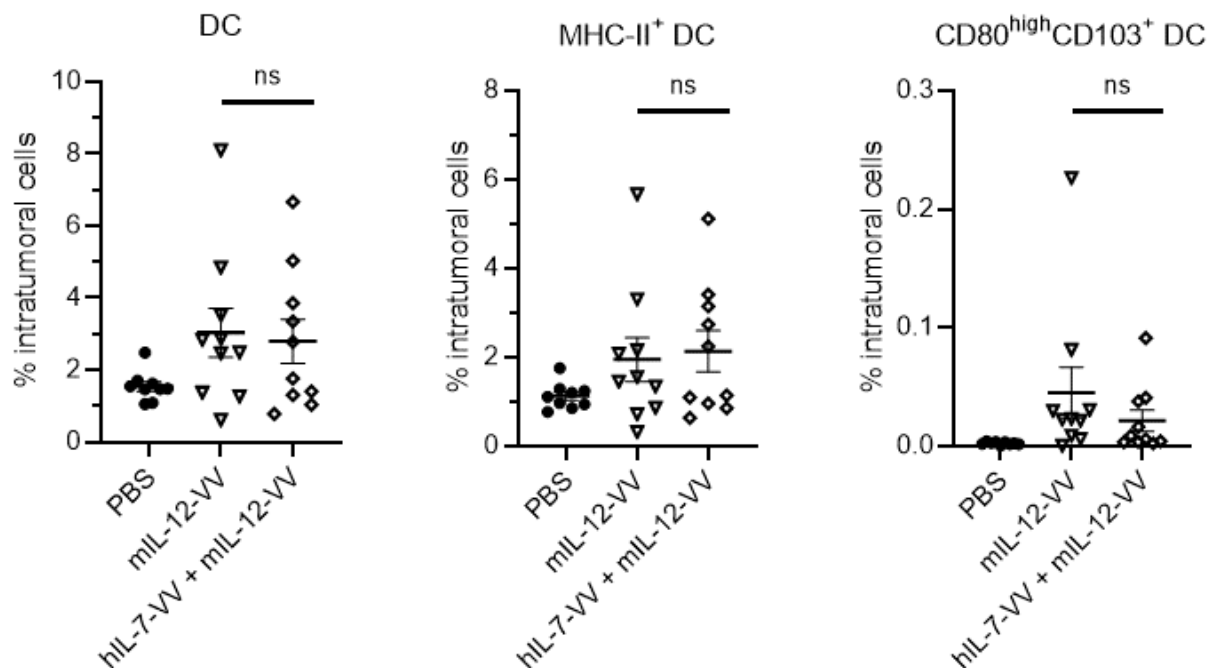

Percentage of DCs in LLC tumors treated with mIL-12-VV alone or in combination with hIL-7-VV.

Mice bearing subcutaneous LLC tumors (about 70 mm<sup>3</sup>) were intratumorally injected with PBS, mIL-12-VV ( $2 \times 10^7$  pfu, supplemented with  $2 \times 10^7$  pfu of Cont-VV) or a combination of hIL-7-VV and mIL-12-VV ( $2 \times 10^7$  pfu each) every other day for a total of three times. Ten days after the last treatment, DCs, MHC class II-expressing mature DCs and CD80<sup>+</sup>CD103<sup>+</sup> DCs were analyzed by flow cytometry (n = 9 to 10). Mean  $\pm$  SEM is shown. ns: no significance between mIL-12-VV alone and in combination with hIL-7-VV by Mann-Whitney *U* test.

Supplementary Figure 5.

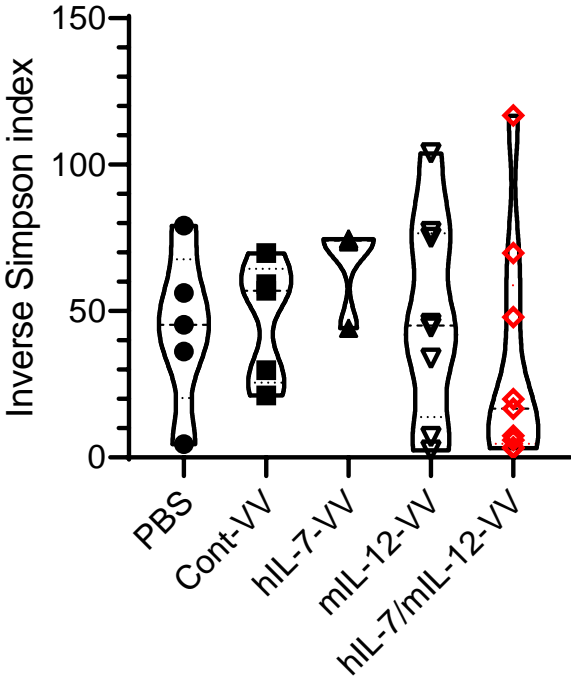

Clonality index (inverse Simpson's index) of intratumoral CD8<sup>+</sup> T cells in each treatment group, as described in Figure 2.

Supplementary Figure 6.

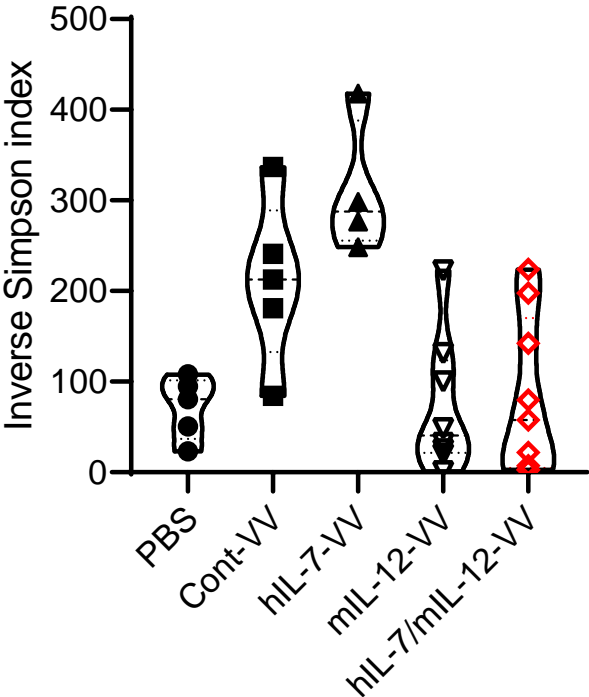

Clonality index (inverse Simpson's index) of intratumoral CD4<sup>+</sup> T cells in each treatment group, as described in Figure 2.

Supplementary Figure 7.

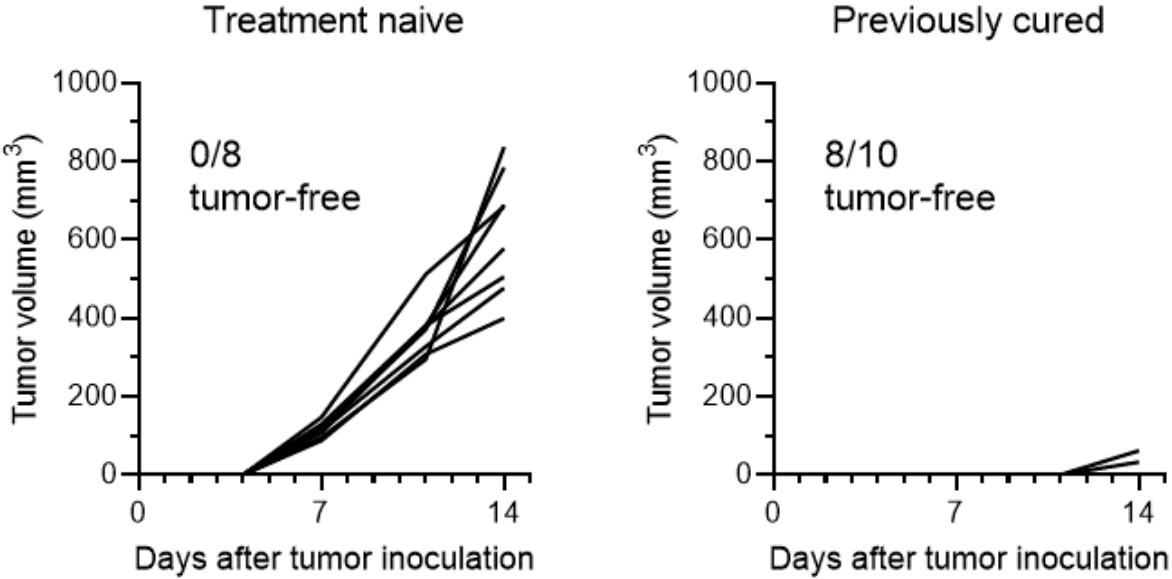

Rejection of rechallenged tumors in mice that had achieved complete tumor regression after treatment with hIL-7/mIL-12-VV. Mice that had achieved complete regression against LLC tumors after intratumoral treatment with hIL-7/mIL-12-VV and age-matched treatment naive mice were subcutaneously inoculated with LLC cells. Tumor growth in individual mice is shown.

**Supplementary Table 1. Frequency of top 5 intratumoral CD4<sup>+</sup> T-cell clones in the spleen**

| Mouse      | CDR3 $\beta$ sequence | % in tumor | % in spleen |
|------------|-----------------------|------------|-------------|
| PBS-1      | CASSPLGYAEQFF         | 3.16       | 0.00        |
|            | CASSLSRGPNERLFF       | 3.13       | 0.00        |
|            | CASSLAGSGNTLYF        | 2.83       | 0.00        |
|            | CASSQPQGTEVFF         | 2.56       | 0.00        |
|            | CASSLPGGYEQYF         | 2.42       | 0.00        |
| PBS-2      | CASSHRGEQYF           | 4.08       | 0.00        |
|            | CASSLSRGSPLYF         | 2.63       | 0.00        |
|            | CASSRTDNYAEQFF        | 2.61       | 0.00        |
|            | CTCSAPDNYEQYF         | 2.61       | 0.01        |
|            | CASSFFNQDTQYF         | 2.25       | 0.00        |
| PBS-3      | CASSDEGRAYEQYF        | 9.67       | 0.00        |
|            | CASSQENSGNTLYF        | 8.44       | 0.00        |
|            | CASSLDDQNTLYF         | 7.65       | 0.00        |
|            | CASRRDRGGQNTLYF       | 7.34       | 0.00        |
|            | CASSPDRDAEQFF         | 5.69       | 0.03        |
| PBS-4      | CASSPPGGWNTLYF        | 7.82       | 0.00        |
|            | CTCSATGTGNSDYTF       | 6.60       | 0.00        |
|            | CASSPQPGNTLYF         | 3.58       | 0.00        |
|            | CASGVGGRDEQYF         | 2.19       | 0.00        |
|            | CASSLGLSNERLFF        | 1.96       | 0.00        |
| PBS-5      | CASGEGLGLAEQFF        | 8.22       | 0.21        |
|            | CASSLDISQNTLYF        | 2.34       | 0.00        |
|            | CASSLELGGPEQYF        | 2.20       | 0.00        |
|            | CSSSPGGAYEQYF         | 2.13       | 0.58        |
|            | CASSQDPGGFYEQYF       | 1.55       | 0.00        |
| Cont-VV-1  | CTCSAGSGNTLYF         | 9.43       | 0.00        |
|            | CASSPTGNTEVFF         | 1.25       | 0.00        |
|            | CASSQLNF              | 1.23       | 0.00        |
|            | CASSLWGGAGTGQLYF      | 1.09       | 0.02        |
|            | CASSQDPYNSPLYF        | 1.04       | 0.00        |
| Cont-VV-2  | CASSQEGLGREQYF        | 1.93       | 0.00        |
|            | CASSISRSGNTLYF        | 1.77       | 0.16        |
|            | CASSFQGSNSDYTF        | 1.65       | 0.01        |
|            | CTCSAGRGSQNTLYF       | 1.55       | 0.03        |
|            | CASSLRDWGVAEQFF       | 1.50       | 0.00        |
| Cont-VV-3  | CASSLQGGRTQYF         | 1.63       | 0.15        |
|            | CASSLQGGTEVFF         | 1.59       | 0.00        |
|            | CASSLEGDTLYF          | 1.50       | 0.10        |
|            | CASSQVNTVEFF          | 1.33       | 0.00        |
|            | CASSRRDRATEVFF        | 1.33       | 0.03        |
| Cont-VV-4  | CASLLTQEQYF           | 1.74       | 0.03        |
|            | CASGLDWGGDQDTQYF      | 1.06       | 0.00        |
|            | CASSLDWGSQNTLYF       | 0.95       | 0.00        |
|            | CASSPGQNTVEFF         | 0.90       | 0.00        |
|            | CASSPGTGGYEQYF        | 0.90       | 0.00        |
| Cont-VV-5  | CASSLESQNTLYF         | 2.72       | 0.03        |
|            | CASSLSGNTLYF          | 2.26       | 0.00        |
|            | CSSQLWANTVEFF         | 1.43       | 0.00        |
|            | CASSIGTGAYEQYF        | 1.27       | 0.00        |
|            | CASSLDWQDQYF          | 1.18       | 0.00        |
| hIL-7-VV-1 | CASSLQNTVEVFF         | 1.81       | 0.01        |
|            | CASGDEAGQNTVEVFF      | 1.60       | 0.00        |
|            | CASSRQDQAPLF          | 1.43       | 0.00        |
|            | CASSRMEDTQYF          | 1.24       | 0.01        |
|            | CASSPTGDQDTQYF        | 1.00       | 0.00        |
| hIL-7-VV-2 | CASSPGTVNTGQLYF       | 1.37       | 0.00        |
|            | CASSRDWGSQNTLYF       | 1.19       | 0.01        |
|            | CTCSAVGGGAETLYF       | 1.07       | 0.19        |
|            | CASSPGPNTVEVFF        | 1.03       | 0.00        |
|            | CASSRSNERLFF          | 0.80       | 0.00        |
| hIL-7-VV-3 | CASSLGTGGSDYTF        | 1.79       | 0.00        |
|            | CASGGGANTEVFF         | 1.68       | 0.00        |
|            | CASSLQNTVEVFF         | 1.30       | 0.00        |
|            | CASSHRAERLFF          | 1.30       | 0.00        |
|            | CASSQEGINTGQLYF       | 1.19       | 0.00        |
| hIL-7-VV-4 | CASGDAYITEVFF         | 2.19       | 0.00        |
|            | CASSLALWGYEQYF        | 1.11       | 0.00        |
|            | CASSQQGWVFF           | 1.11       | 0.00        |
|            | CASSQEGTNERLFF        | 1.07       | 0.06        |
|            | CSSSRQGETLYF          | 1.04       | 0.00        |

| Mouse             | CDR3 $\beta$ sequence | % in tumor | % in spleen |
|-------------------|-----------------------|------------|-------------|
| mIL-12-VV-1       | CTCSAGQGWEQYF         | 8.51       | 0.00        |
|                   | CASSLEGGQDTQYF        | 7.60       | 0.18        |
|                   | CTCSALGTSQDTQYF       | 6.25       | 0.00        |
|                   | CASSDGGTEVFF          | 5.31       | 0.00        |
|                   | CASSPDWASSYEQYF       | 4.98       | 0.00        |
| mIL-12-VV-2       | CASGDADRRGSDYTF       | 89.65      | 0.00        |
|                   | WASGDADRRGSDYTF       | 0.48       | 0.00        |
|                   | CASGDADRRGSDYTV       | 0.31       | 0.00        |
|                   | CAGGDADRRGSDYTF       | 0.25       | 0.00        |
|                   | CASGDVDRRGSDYTF       | 0.20       | 0.00        |
| mIL-12-VV-3       | CASSGQGNTEVFF         | 6.45       | 0.30        |
|                   | CASSRDWGDQYF          | 6.30       | 0.48        |
|                   | CASSPMTGGEQYF         | 6.30       | 0.00        |
|                   | CASSLETDNQDTQYF       | 5.80       | 0.00        |
|                   | CASSRLGVQNTLYF        | 5.29       | 0.10        |
| mIL-12-VV-4       | CASSLEGQNTLYF         | 16.07      | 0.07        |
|                   | CASGDWGGYEQYF         | 7.79       | 0.00        |
|                   | CGARETGDEQYF          | 5.39       | 0.04        |
|                   | CASRTAERLFF           | 5.14       | 0.00        |
|                   | CASSLEGGSNERLFF       | 4.78       | 0.03        |
|                   |                       |            |             |
| hIL-7/mIL-12-VV-1 | CASRVGRDQYF           | 6.53       | 0.00        |
|                   | CASSQTYNYAEQFF        | 5.44       | 0.03        |
|                   | CASSLEGGEDTQYF        | 3.22       | 0.00        |
|                   | CASGDAGGALGEQYF       | 3.20       | 0.00        |
|                   | CTCSADPGTGTEVFF       | 2.17       | 0.00        |
| hIL-7/mIL-12-VV-2 | CAWSLMRDTEVFF         | 43.62      | 0.00        |
|                   | CASSLWGGAEQYF         | 43.07      | 0.00        |
|                   | CASSLDTNTGQLYF        | 5.45       | 0.00        |
|                   | CASSRWGGAEQYF         | 0.21       | 0.00        |
|                   | CASALWGGAEQYF         | 0.19       | 0.00        |
| hIL-7/mIL-12-VV-3 | CASSFYVFF             | 49.60      | 0.00        |
|                   | CASSDPGGTETLYF        | 31.61      | 0.03        |
|                   | CTCSATGEGNTLYF        | 13.00      | 0.00        |
|                   | CASSCYVFF             | 0.17       | 0.00        |
|                   | CASSVYVFF             | 0.14       | 0.00        |
| hIL-7/mIL-12-VV-4 | CASSYSQNTLYF          | 13.90      | 0.03        |
|                   | CASGGGDNNQAPLF        | 10.96      | 0.00        |
|                   | CASSLQGFYNSPLYF       | 3.25       | 0.01        |
|                   | CAWSLGLGDQDTQYF       | 3.19       | 0.00        |
|                   | CTCSADGTGDYEQYF       | 3.19       | 0.01        |
| hIL-7/mIL-12-VV-5 | CASSLPGQGGSQNTLYF     | 2.92       | 0.13        |
|                   | CASSQPQGTNERLFF       | 1.77       | 0.00        |
|                   | CSSSQGTGGYEQYF        | 1.30       | 0.03        |
|                   | CASGDWGANTGQLYF       | 1.30       | 0.00        |
|                   | CAWSLGIANSDYTF        | 1.29       | 0.01        |

Information including TRBV, TRBJ, and the number of reads is described in Supplementary Data File 2.
